# Supplementary material for: A facile approach to fabricate halloysite/metal nanocomposites with preformed and in situ synthesized metal nanoparticles: a comparative study of their enhanced catalytic activity
Source: Royal Society of Chemistry journal article supplement (doi:10.1039/c5dt00830a), 2015-01-01
Supplement: c5dt00830a1.pdf [file c5dt00830a1.pdf]

## Electronic Supplementary Information

### **A facile approach to fabricate halloysite/metal nanocomposites with preformed and *in-situ* synthesized metal nanoparticles: A comparative study of their enhanced catalytic activity**

Sankar Das and Subhra Jana\*

Department of Chemical, Biological & Macro-Molecular Sciences, S. N. Bose National Centre for Basic Sciences, Block - JD, Sector-III, Salt Lake, Kolkata -700098, India.

#### **\*Corresponding Author**

#### **Dr. Subhra Jana**

Department of Chemical, Biological & Macro-Molecular Sciences  
S. N. Bose National Centre for Basic Sciences  
Sector-III, Block - JD, Salt Lake, Kolkata - 700 098, India  
E-mail: [subhra.jana@bose.res.in](mailto:subhra.jana@bose.res.in)  
Phone: + 91 33 2335 5706-8  
Fax: +91 33 2335 3477

## Materials

All chemicals were used as received. Halloysite nanotubes (HNTs), gold(III) chloride trihydrate ( $\geq 99.9\%$ ), silver nitrate (99.9999%), 1-octadecene, oleylamine (70%), and sodium borohydride ( $\text{NaBH}_4$ ) were purchased from Sigma-Aldrich. (3-aminopropyl) triethoxysilane (APTES, 97%) and 2-nitrobenzoic acid were received from Alfa Aesar. Toluene was obtained from Merck. 4-nitrobenzoic acid, 2-nitrophenol, and 4-nitrophenol (4-NP) were received from Sisco Research Laboratory, India.

## Characterization

Fourier transform infrared (FTIR) spectra were recorded in the range of 400 to 4000  $\text{cm}^{-1}$  using JASCO FT/IR 6300. Powder X-ray diffraction (XRD) analysis was carried out by RIGAKU MiniFlex II powder diffractometer using  $\text{Cu K}\alpha$  radiation with 35 kV beam voltage and 15 mA beam current. The morphology of HNTs was characterized using transmission electron microscopy (TEM: FEI TECNAI G2 F20-ST) operating at 200 kV and field emission scanning electron microscopy (FESEM: FEI QUANTA FEG 250) after drop casting a drop of solution on a carbon coated copper grid and silicon wafer respectively. High resolution transmission electron microscopy (HR-TEM) and Energy dispersive X-ray spectroscopy (EDX) have been performed in the above mentioned TEM operating at 200 kV. UV-visible absorption spectra were recorded at room temperature using a Shimadzu spectrometer, UV-2600.

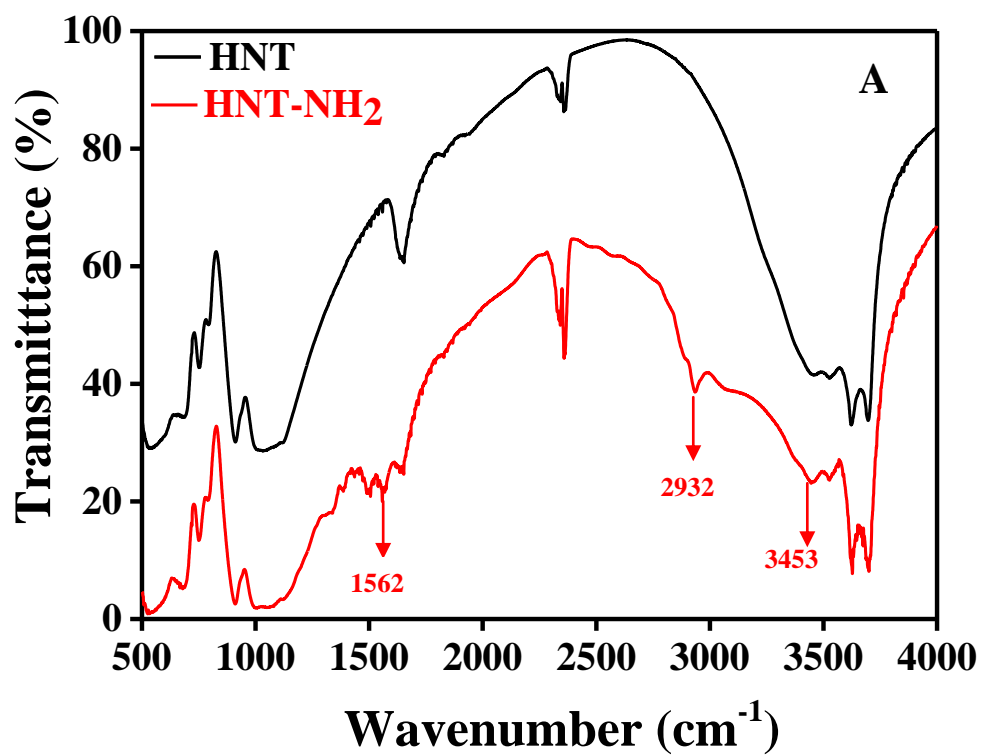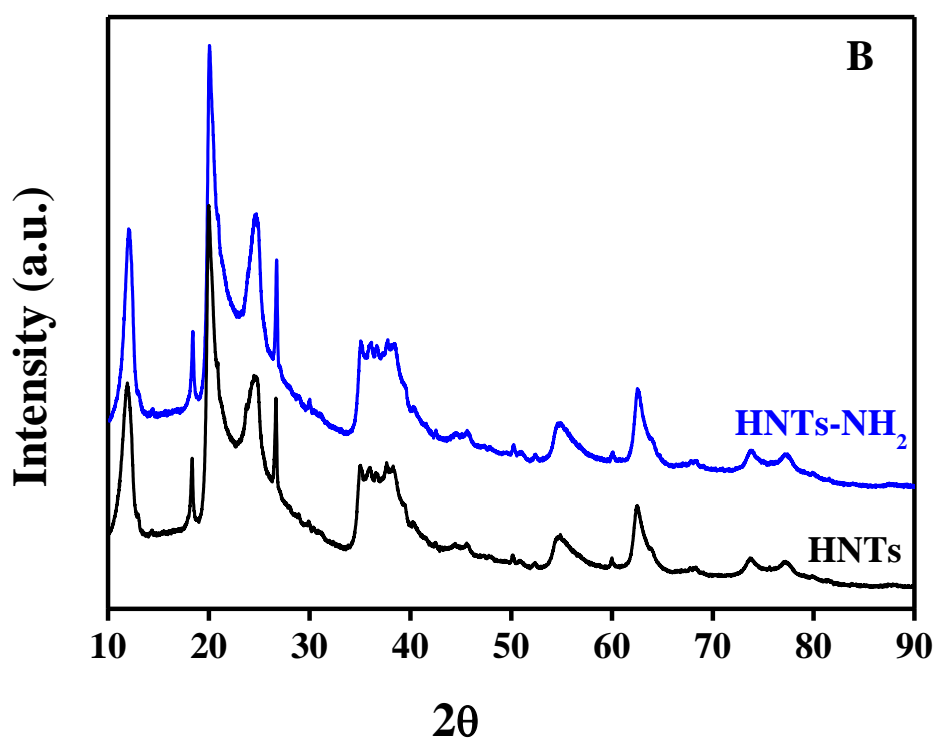

**Fig. S1** (A) FTIR spectra and (B) XRD patterns of HNTs and aminosilane modified HNTs (HNTs-NH<sub>2</sub>) respectively.

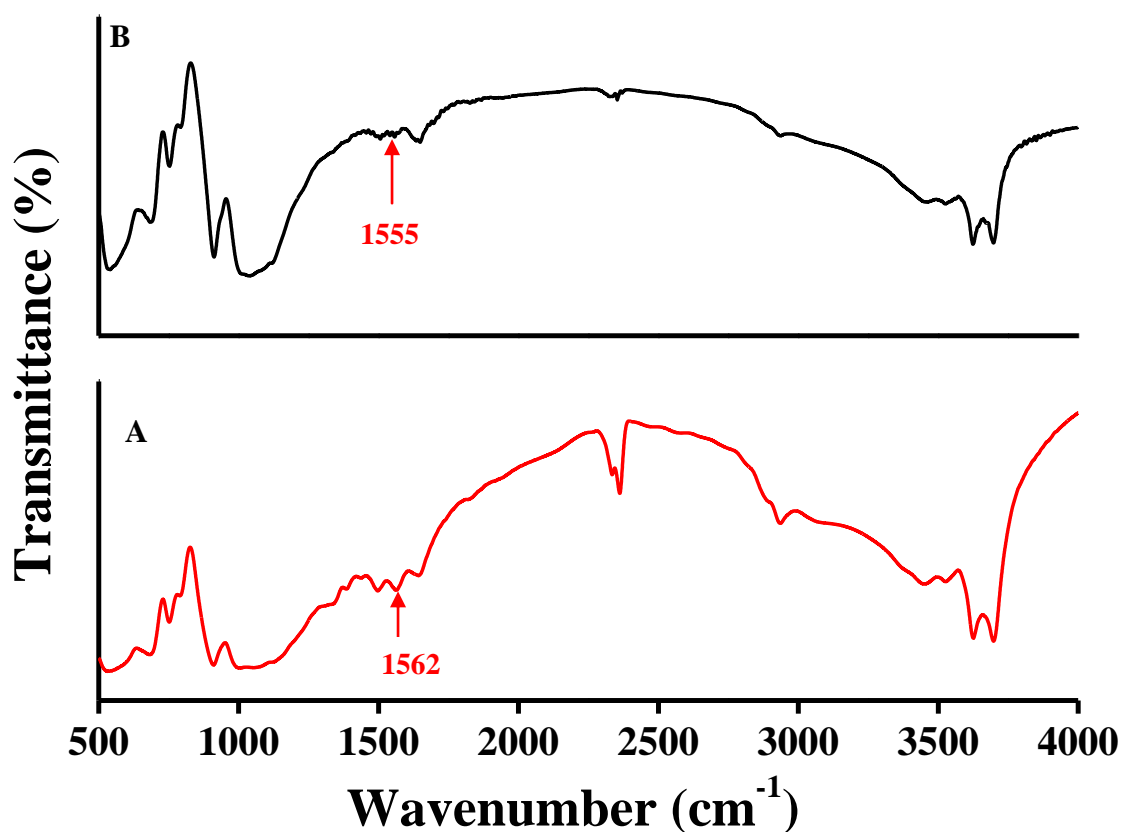

**Fig. S2** Representative FTIR spectra of (A) HNTs-NH<sub>2</sub> and (B) HNTs/Ag nanocomposites, synthesized after immobilization of Ag NPs over the surface of HNTs-NH<sub>2</sub>. FTIR analysis further demonstrates the immobilization of metal NPs over the surface of HNTs-NH<sub>2</sub>. After the immobilization of Ag NPs, the intensity of the peak at 1562 cm<sup>-1</sup> for N-H deformation in HNTs-NH<sub>2</sub> has been decreased and shifted to 1555 cm<sup>-1</sup>, which further demonstrated that the aminosilane behaves as a linker molecule and strengthen the interfacial adhesion of NPs over HNTs surfaces.

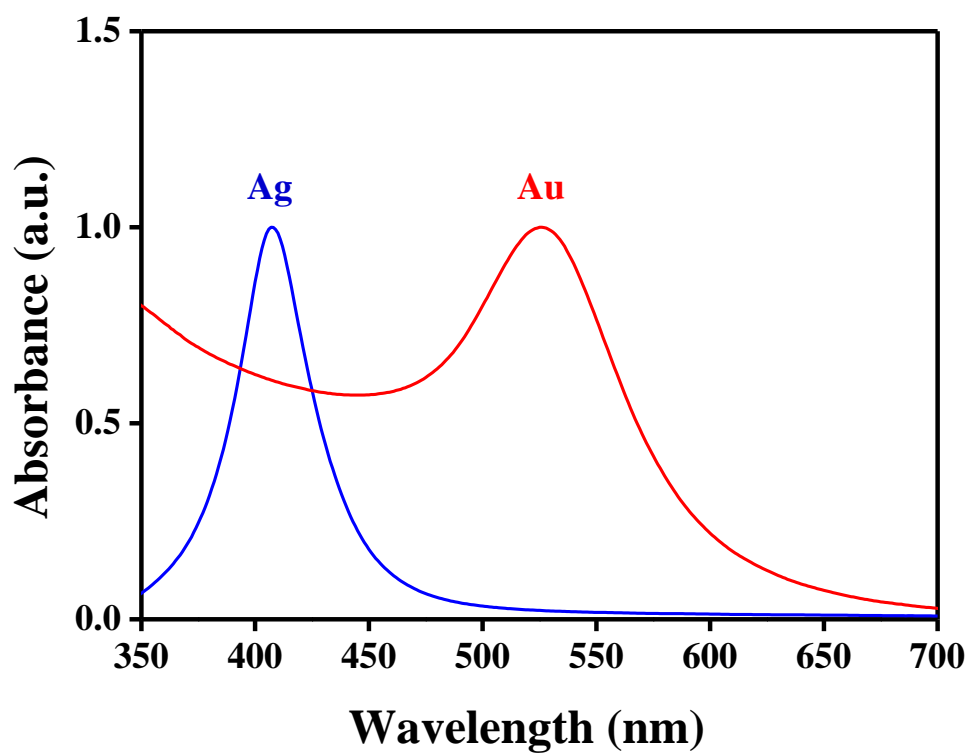

**Fig. S3** UV-Visible absorption spectra of colloidal Au and Ag nanoparticles before immobilization over the surface of aminosilane modified HNTs (HNTs-NH<sub>2</sub>).

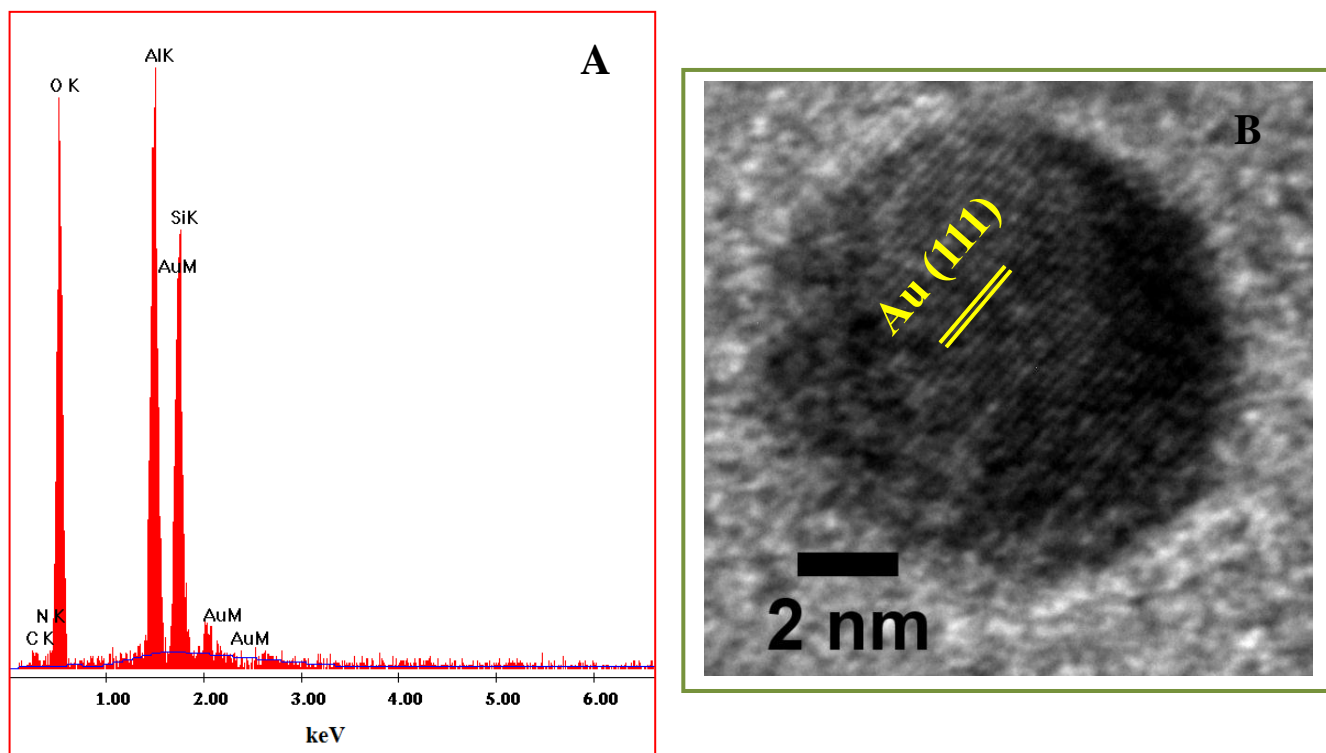

**Fig. S4** (A) A representative EDX spectrum of preformed HNTs/Au nanocomposites, indicating the presence of Au nanoparticle in the nanocomposites. (B) HRTEM image of Au nanoparticles loaded over the surface of aminosilane modified HNTs, demonstrating (111) planes of the fcc Au.

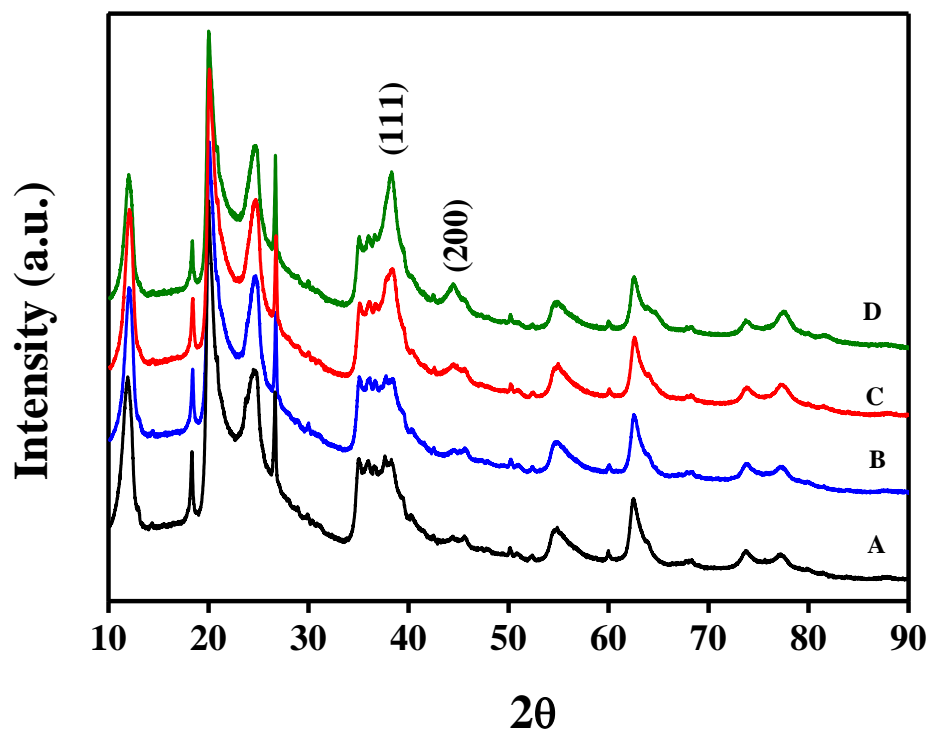

**Fig. S5** XRD patterns of (A) HNTs and (B) aminosilane modified HNTs (HNTs-NH<sub>2</sub>). (C) and (D) XRD patterns of *in-situ* synthesized HNTs/Ag and HNTs/Au nanocomposites respectively, demonstrating the formation HNTs/metal nanocomposites through the immobilization of their respective precursor followed by the reduction using sodium borohydride.

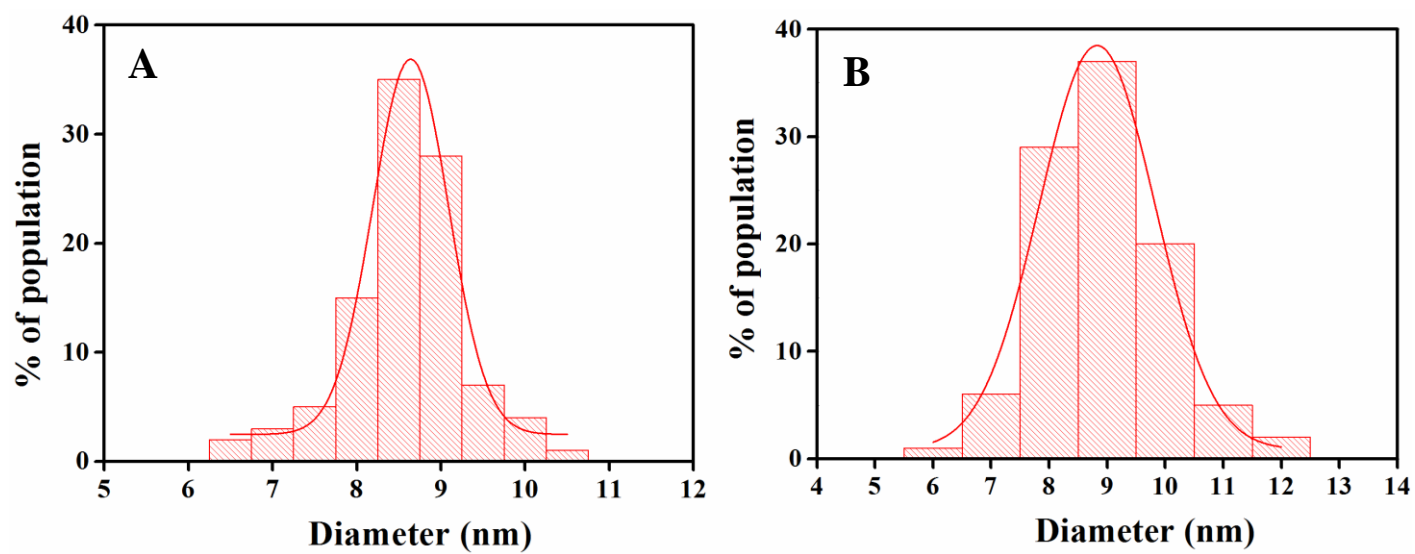

**Fig. S6** Histograms of particle size distribution of Ag nanoparticles immobilized in (A) preformed and (B) *in-situ* synthesized HNTs/Ag nanocomposites.



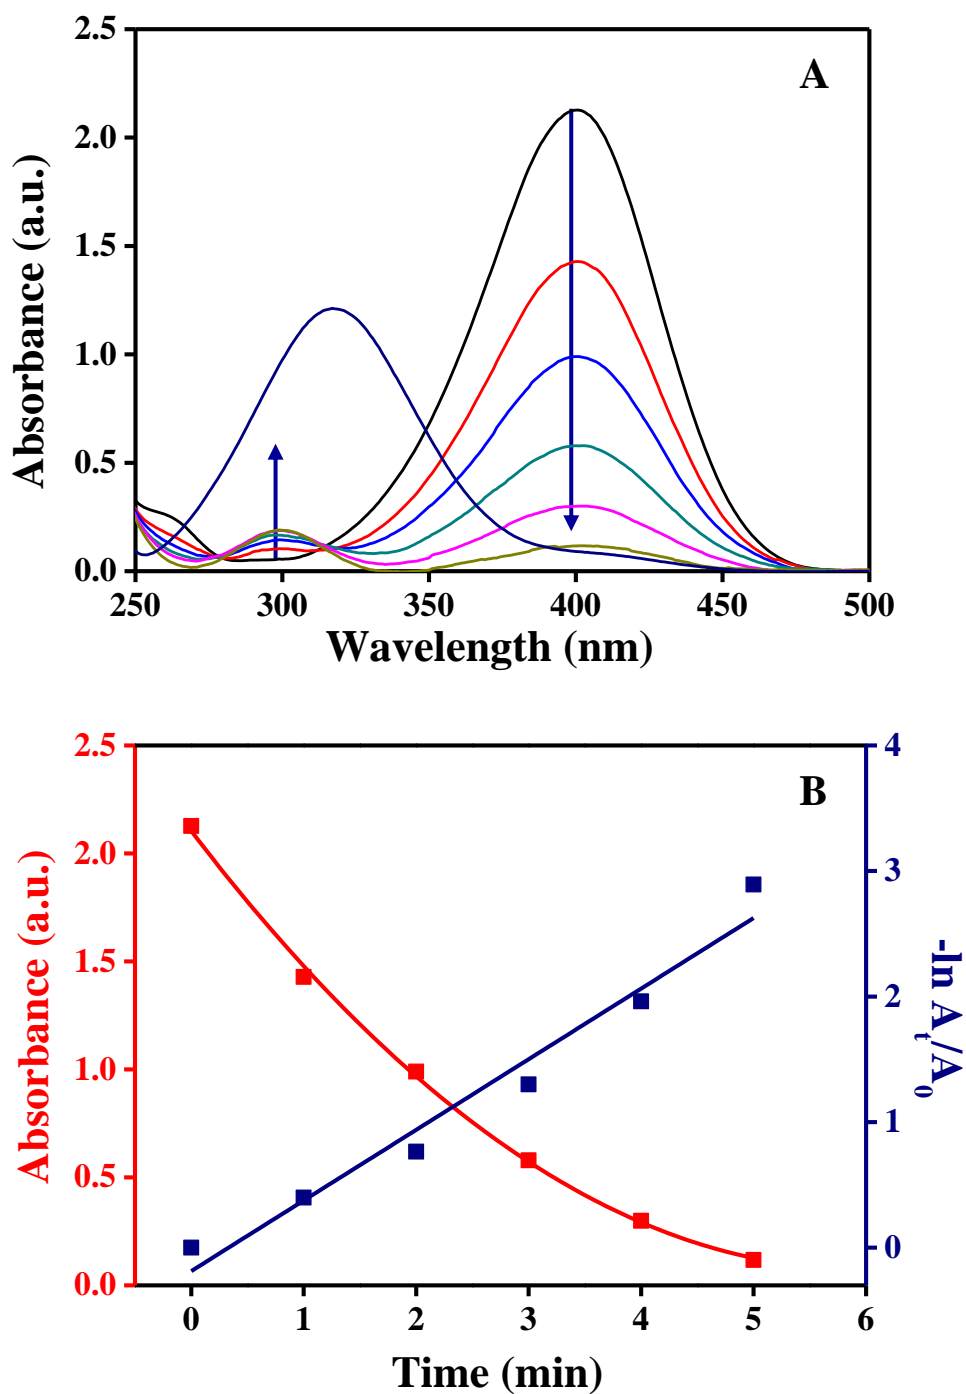

**Fig. S7** (A) UV–Visible spectra for the successive reduction of 0.1 mM 4-NP using 0.1 M NaBH<sub>4</sub>, in presence of 2.0 mg of preformed HNTs/Ag nanocomposites at an interval of 1 min. (B) plot of absorbance and  $\ln A_t/A_0$  as a function of reaction time for pseudo-first-order reduction kinetics of 4-nitrophenol.
